# Supplementary material for: Targeting Macrophage Ferroptosis: A Mechanism of Lanxangia tsaoko methanol extract Inhibits VEGF to Attenuates ulcerative colitis
Source: Research Square preprint supplement (doi:10.21203/rs.3.rs-7446251/v1), 2025-10-20
Supplement: Supplementary file 1 [file 725ad5b56ba1270744bf92bc.docx]

**Supplementary Table 1.** DAI scoring.

| **NO.** | **Feature** | **Score** | **Description** |
| --- | --- | --- | --- |
| S1 | **Weight loss** | 0 | ＜1% |
|  |  | 1 | 1%≤S1≤5% |
|  |  | 2 | 5%＜S1≤10% |
|  |  | 3 | 10%＜S1≤15% |
|  |  | 4 | ＞15% |
| S2 | Feces status | 0 | Normal |
|  |  | 2 | Loose stools |
|  |  | 4 | Watery stool |
| S3 | Bloody stools | 0 | Cryptorrhagia negative |
|  |  | 2 | Cryptorrhagia positive |
|  |  | 4 | Hematochezia |

**Supplementary Table 2.** UHPLC-QTOF-MS/MS Analytical Results.

| **No.** | **tR(min)** | **Formula** | **Adduct** | **δ(ppm)** | **Fragment ions (m/z)** | **Name** | **InChIKeys** | **References** |
| --- | --- | --- | --- | --- | --- | --- | --- | --- |
| 1* | 2.537 | C21H24O11 | [M+K]+ | -8.8 | 371.0574, 253.0688, 139.0377 | [3,4,5-trihydroxy-6-(4-hydroxy-2-methoxyphenoxy)oxan-2-yl]methyl4-hydroxy-3-methoxybenzoate | JUWPDDCLNHOUNO-UHFFFAOYSA-N |  |
| 2 | 2.692 | C15H20O9 | [M+Na]+ | -8.27 | 277.0477, 243.1009, 193.0511, 121.0307 | 6-(6-ethyl-3-hydroxy-2-methoxyphenoxy)-3,4,5-trihydroxyoxane-2-carboxylic acid | NONE |  |
| 3 | 3.07 | C30H26O12 | [M+H]+ | 7.44 | 425.1076, 385.1295, 371.1480, 203.1795 | Procyanidin | HGVVOUNEGQIPMS-UHFFFAOYSA-N |  |
| 4 | 3.259 | C8H12O3 | [M+H]+ | 3.34 | 147.0120, 121.0622, 115.0532 | 2-(cyclohex-3-en-1-yl)-2-hydroxyacetic acid* | LXWUNTAANSNEGB-UHFFFAOYSA-N |  |
| 5 | 3.468 | C18H30O9 | [M+Na]+ | 2.57 | 387.1278, 237.0046, 181.0527 | (-)-11-hydroxy-9,10-dihydrojasmonic acid 11-beta-D-glucoside | QPYZJXJBZOQDGA-XGNCEZCHSA-N |  |
| 6* | 3.725 | C14H20O8 | [M+K]+ | -5.77 | 219.0317, 201.0066, 147.0690 | Vanilloloside | SIMPNXWTAVEOTO-RKQHYHRCSA-N |  |
| 7* | 4.811 | C13H16O5 | [M-H2O+H]+ | 0.34 | 203.0064, 191.0011, 167.0717, 147.0418 | (4aS,5R,6S)-4a,5-dihydroxy-3-(methoxymethyl)-6-vinyl-4a,5,6,7-tetrahydro-4H-chromen-4-one | PTPJFJWUFUTPEZ-XTWCZFFVSA-N |  |
| 8 | 5.019 | C22H38O13 | [M+K]+ | -1.18 | 371.1678, 251.0255, 189.0211 | [3,4,5-Trihydroxy-6-(hydroxymethyl)oxan-2-yl] 2,6-dimethyl-8-[3,4,5-trihydroxy-6-(hydroxymethyl)oxan-2-yl]oxyoct-2-enoate | SXYZSPUAXKAFMK-UHFFFAOYSA-N |  |
| 10* | 5.242 | C10H20O3 | [M+Na]+ | -5.83 | 189.0155, 165.0598, 151.0435 | 10-hydroxycapric acid | YJCJVMMDTBEITC-UHFFFAOYSA-N |  |
| 11 | 5.33 | C10H12O | [M+H]+ | 1.29 | 123.0447, 115.0532, 107.0504 | Cuminaldehyde | WTWBUQJHJGUZCY-UHFFFAOYSA-N |  |
| 12* | 5.674 | C27H30O16 | [M+H]+ | 1.08 | 533.1966, 303.0522, 189.0155, 153.0671, 105.0234 | Rutin | IKGXIBQEEMLURG-NVPNHPEKSA-N |  |

**Supplementary Table 2. (*continued*)**

| **No.** | **tR(min)** | **Formula** | **Adduct** | **δ(ppm)** | **Fragment ions (m/z)** | **Name** | **InChIKeys** | **References** |
| --- | --- | --- | --- | --- | --- | --- | --- | --- |
| 13* | 5.708 | C32H50O14 | [M+K]+ | -3.93 | 533.2155, 303.0522, 191.0690 | Alpindenoside C | RPQCAISSRKTLEA-BOWDQLTHSA-N |  |
| 14 | 5.863 | C21H36O11 | [M+K]+ | 0.04 | 465.1776, 341.0032, 283.0644, 135.0804 | 2-[[4-(2-hydroxypropan-2-yl)cyclohexen-1-yl]methoxy]-6-[(3,4,5-trihydroxyoxan-2-yl)oxymethyl]oxane-3,4,5-triol | MQXZFEFINCOMLT-UHFFFAOYSA-N |  |
| 15 | 5.897 | C21H30O10 | [M+K]+ | 0.35 | 303.0487, 283.0610, 215.1066 | Lusitanicoside | DAELTTGCCPRYTP-ZLQZEYEISA-N |  |
| 16 | 5.984 | C21H24O11 | [M+K]+ | 1.15 | 355.1733, 201.0066, 143.0203 | Catechin 7-glucoside | VLFIBROLAXKPQK-UHFFFAOYSA-N |  |
| 17* | 6.018 | C21H20O12 | [M+H]+ | 0.54 | 355.1733, 177.0553 | Quercetin 3-galactoside | OVSQVDMCBVZWGM-DTGCRPNFSA-N |  |
| 18* | 6.105 | C26H40O9 | [M+K]+ | 0.38 | 487.2161, 355.1733, 177.0553 | Virescenoside M | MAUNRHHHTKXIPX-LVEBLLTKSA-N |  |
| 19* | 6.207 | C30H24O12 | [M+H]+ | -7.03 | 355.1733, 287.0511, 177.0580 | 2-(3,4-dihydroxyphenyl)-6-[2-(3,4-dihydroxyphenyl)-3,7-dihydroxy-3,4-dihydro-2H-chromen-4-yl]-3,5,7-trihydroxy-2,3-dihydrochromen-4-one | KVTRZVUKZWIKEO-UHFFFAOYSA-N |  |
| 20 | 6.261 | C26H36O8 | [M+Na]+ | -1.6 | 355.1733, 261.1099,201.0066 | 1-(3-Cyclopentyloxy-4-hydroxyphenyl)-7-[4-hydroxy-3-(hydroxymethoxy)-5-methoxyphenyl]heptane-3,5-diol | YFLNSXUCASDJPF-UHFFFAOYSA-N |  |
| 21* | 6.328 | C24H22O12 | [M+H]+ | -3.38 | 269.1056, 145.0290 | Isoflavone base + 2O, O-MalonylHex | MTXMHWSVSZKYBT-UHFFFAOYSA-N |  |
| 22 | 6.416 | C31H34O9 | [M-H2O+H]+ | 2.72 | 439.1223, 269.1089 | 4-[(3,4-Dimethoxyphenyl)methyl]-3-[[2-(4-hydroxy-3-methoxyphenyl)-3-(hydroxymethyl)-7-methoxy-2,3-dihydro-1-benzofuran-5-yl]methyl]oxolan-2-one | KNSPNZVXPUCWMJ-UHFFFAOYSA-N |  |

**Supplementary Table 2. (*continued*)**

| **No.** | **tR(min)** | **Formula** | **Adduct** | **δ(ppm)** | **Fragment ions (m/z)** | **Name** | **InChIKeys** | **References** |
| --- | --- | --- | --- | --- | --- | --- | --- | --- |
| 23 | 6.517 | C24H18O3 | [M+K]+ | -0.42 | 193.0170, 125.0227 | 7-[(4-ethenylbenzyl)oxy]-3-phenyl-4H-chromen-4-one | QUAJLRNSRYXPRA-UHFFFAOYSA-N |  |
| 24* | 6.726 | C27H30O15 | [M+H]+ | 1.43 | 287.0546, 145.0216 | Biorobin | RTATXGUCZHCSNG-KYGWAIEOSA-N |  |
| 25 | 7.104 | C22H22O12 | [M+H]+ | -3.97 | 327.0549, 153.0544 | 2-(3,4-Dihydroxyphenyl)-7-hydroxy-5-methoxy-3-[3,4,5-trihydroxy-6-(hydroxymethyl)oxan-2-yl]oxychromen-4-one | HJOBXPHWOUTSLV-UHFFFAOYSA-N |  |
| 26 | 7.38 | C23H34O11 | [M+K]+ | 4.46 | 395.2013, 225.1117, 165.0598 | [4-Hydroxy-3-(hydroxymethyl)-4-methyl-2-[2-[3,4,5-trihydroxy-6-(hydroxymethyl)oxan-2-yl]oxyethyl]cyclopentyl] 4-methoxybenzoate | NXYYIKXGZKILRL-UHFFFAOYSA-N |  |
| 27* | 7.569 | C23H22O7 | [M+K]+ | -1.68 | 267.0318, 205.0593 | Preferrugone | MPXZANSYFFXBJX-UHFFFAOYSA-N |  |
| 28 | 7.657 | C32H50O14 | [M+K]+ | 4.28 | 293.0379, 191.0746 | Ajugaside A | AKJKBBDQAFRAJQ-BVTVIDMQSA-N |  |
| 29 | 7.846 | C22H26O11 | [M+K]+ | 2.94 | 267.0385, 217.0135 | 2-[[3,7-dihydroxy-2-(3-hydroxy-4-methoxyphenyl)-3,4-dihydro-2H-chromen-5-yl]oxy]-6-(hydroxymethyl)oxane-3,4,5-triol | GPVCBKWGXPUYOQ-UHFFFAOYSA-N |  |
| 30* | 7.914 | C22H16O9 | [M+H]+ | 0.49 | 397.1807, 273.0438, 203.0425 | 4-hydroxy-3-[2-hydroxy-5-(3,5,7-trihydroxy-4-oxo-2,3-dihydrochromen-2-yl)phenyl]benzoic acid | HPQHGBFQHWMBIV-UHFFFAOYSA-N |  |
| 31* | 8.122 | C21H24O7 | [M+K]+ | 3.76 | 207.0684, 191.0746, 105.0695 | Tsaokopyranol J | NONE | [1] |
| 32 | 8.156 | C15H28O4 | [M+K]+ | 8.51 | 151.0410, 123.0447 | 7(14)-Bisabolene-2,3,10,11-tetrol | DIVJRNQAZRYCIO-UHFFFAOYSA-N |  |

**Supplementary Table 2. (*continued*)**

| **No.** | **tR(min)** | **Formula** | **Adduct** | **δ(ppm)** | **Fragment ions (m/z)** | **Name** | **InChIKeys** | **References** |
| --- | --- | --- | --- | --- | --- | --- | --- | --- |
| 33 | 8.277 | C28H34O3 | [M+K]+ | -2.98 | 237.0424, 173.0298 | 5-(4-butoxyphenyl)-3-[2-(4-butoxyphenyl)ethenyl]cyclohex-2-en-1-one | CBJVCGUDTVVKIW-UHFFFAOYSA-N |  |
| 34 | 8.311 | C27H24O3 | [M+K]+ | 1.27 | 237.0456, 203.0571, 173.0271 | 6-cinnamyloxy-2-[(4-isopropylphenyl)methylene]benzofuran-3-one | NEPNFPFGQXMEPM-UHFFFAOYSA-N |  |
| 35 | 8.379 | C20H31NO2 | [M+H]+ | -6.02 | 282.2216, 144.0818 | 4-(2-Hydroxypropan-2-yl)-8,8,11a-trimethyl-6,7,7a,9,10,11-hexahydrobenzo[g][3]benzazepin-11b-ol | ZMXUXINJBFGKKP-UHFFFAOYSA-N* |  |
| 36 | 8.466 | C29H34O10 | [M+K]+ | 4.34 | 317.1291, 263.1506, 107.0504 | Tsaokopyranol B | NONE | [1] |
| 37* | 8.534 | C25H30O8 | [M-H2O+H]+ | -1.57 | 301.0750, 175.0408, 151.0385 | Tsaokoflavanol D | NONE | [2] |
| 38 | 8.588 | C10H18O3 | [M-H2O+H]+ | -0.5 | 151.0385, 115.0554, 107.0504 | (E)-10-Hydroxy-8-decenoic acid | RCXJFGCVOBRFEH-FNORWQNLSA-N |  |
| 39 | 8.689 | C25H36O10 | [M+K]+ | 3.44 | 373.2007, 245.0445 | (E)-10-Hydroxy-8-decenoic acid | CAGPKWVTJKYPLU-UHFFFAOYSA-N |  |
| 40 | 8.743 | C30H24O12 | [M+H]+ | -7.03 | 397.1848, 245.0477 | Proanthocyanidin A2 | NSEWTSAADLNHNH-LSBOWGMISA-N |  |
| 41 | 8.777 | C31H36O11 | [M+K]+ | -5.44 | 563.2280, 371.1559, 107.0842 | Buddlenol B | LCXGTSCVCJANHX-AATRIKPKSA-N |  |
| 42* | 9 | C25H30O8 | [M+H]+ | 4.46 | 397.1848, 153.0671, 133.0146 | Tsaokoflavanol N | NONE | [2] |
| 43 | 9.121 | C13H18O8 | [M+H]+ | 5.77 | 189.0211, 107.0504 | 2-menthoxyhydroquinone-4-O-β-D-glucopyranoiside | NONE |  |
| 44* | 9.242 | C35H52O20 | [M+K]+ | -6.62 | 339.1542, 189.0211 | Triplostoside A | DNZCAZQBJHUVDX-UHFFFAOYSA-N |  |

**Supplementary Table 2. (*continued*)**

| **No.** | **tR(min)** | **Formula** | **Adduct** | **δ(ppm)** | **Fragment ions (m/z)** | **Name** | | **InChIKeys** | **References** |
| --- | --- | --- | --- | --- | --- | --- | --- | --- | --- |
| 45 | 9.363 | C32H48O13 | [M+K]+ | 3.2 | 533.2061, 169.0346 | Alpindenoside A | | AEVODBWMGQYTNO-UOXHRDLNSA-N |  |
| 46 | 9.431 | C18H30O8 | [M+Na]+ | 2.21 | 219.0317, 145.0142, 131.0514 | UNKNOWN | | UNKNOWN |  |
| 47 | 9.552 | C22H14O6 | [M+H]+ | 4.32 | 247.0602, 229.1422 | 10-(Furan-2-yl)-5-hydroxy-2-phenyl-9,10-dihydropyrano[2,3-f]chromene-4,8-dione* | | PVSQTOIIUCMCGI-UHFFFAOYSA-N |  |
| 48* | 9.708 | C32H48O13 | [M+K]+ | -5.08 | 533.2061, 131.0865 | Alpindenoside B | | AEVODBWMGQYTNO-DZCMOYGGSA-N |  |
| 49 | 9.863 | C31H34O11 | [M+K]+ | 3.9 | 519.2515, 137.0591, 107.0504 | Amomutsaokol B | | NONE | [3] |
| 50 | 9.897 | C19H22O4 | [M+K]+ | 5.63 | 263.0245, 203.0366, 107.0504 | Amomutsaokol G | | NONE | [3] |
| 51 | 9.93 | C18H22O8 | [M+K]+ | 1.16 | 353.1440, 189.0239 | 3-Butylidene-7-[3,4,5-trihydroxy-6-(hydroxymethyl)oxan-2-yl]oxy-2-benzofuran-1-one | | LNWJAAMNXBMBCE-UHFFFAOYSA-N |  |
| 52 | 10.052 | C12H16O4 | [M+K]+ | 1.42 | 167.0744, 107.0504 | UNKNOWN | UNKNOWN | |  |
| 53* | 10.294 | C29H32O8 | [M+K]+ | -0.83 | 485.1993, 317.0853, 115.0554 | 3-(4-hydroxy-3,5-dimethoxyphenyl)-9-(3-hydroxypropoxy)-7-methoxy-3,4,5,6-tetrahydro-2H-naphtho[2,1-f]chromen-4-ol | MNKHMLSKXKJJRS-UHFFFAOYSA-N | |  |
| 54 | 10.328 | C29H38O4 | [M+H]+ | -9.36 | 151.0385, 115.0532 | Celastrol | KQJSQWZMSAGSHN-JJWQIEBTSA-N | |  |
| 55* | 10.396 | C25H30O7 | [M+Na]+ | -5.49 | 313.1407, 151.0410, 107.0525 | Amomutsaokin E | NONE | | [4] |
| 56 | 10.45 | C12H16O4 | [M+Na]+ | -6.78 | 167.0744, 107.0504 | Senkyunolide I | DQNGMIQSXNGHOA-JXQVETIVSA-N | |  |

**Supplementary Table 2. (*continued*)**

| **No.** | **tR(min)** | **Formula** | **Adduct** | **δ(ppm)** | **Fragment ions (m/z)** | **Name** | | **InChIKeys** | **References** |
| --- | --- | --- | --- | --- | --- | --- | --- | --- | --- |
| 57 | 10.517 | C26H46O9 | [M+Na]+ | 2 | 203.0512, 137.0615 | 9-[6-[5-(1,3-dihydroxy-2-methyl-butyl)-3-methyl-tetrahydrofuran-2-yl]-5,6-dihydroxy-3-methyl-hex-2-enoyl]oxynonanoic acid | KSIISLVQHFGDEP-UHFFFAOYSA-N | |  |
| 58* | 10.605 | C22H36O12 | [M+Na]+ | -4.68 | 167.0691, 151.0410, 115.0554 | [3,4,5-trihydroxy-6-[[3,4,5-trihydroxy-6-(hydroxymethyl)oxan-2-yl]oxymethyl]oxan-2-yl] 2,6,6-trimethylcyclohexene-1-carboxylate | URTXXFGOVQACIC-UHFFFAOYSA-N | |  |
| 59* | 10.915 | C22H31NO3 | [M+H]+ | -0.64 | 170.0977, 144.0818 | Piperchabamide D | DOGZABSTLUIXJO-WGDLNXRISA-N | |  |
| 60* | 10.949 | C27H32O9 | [M+K]+ | -7.02 | 151.0385, 107.0504, 103.0532 | Tsaokoflavanol E | | NONE | [2] |
| 61 | 11.104 | C18H32O5 | [M+Na]+ | 5.16 | 191.0011, 163.0052 | Malyngic acid* | | MKYUCBXUUSZMQB-OADLNGDBSA-N |  |
| 62 | 11.172 | C12H18O4 | [M+K]+ | 4.28 | 177.0553, 151.0385, 123.0447 | UNKNOWN | | UNKNOWN |  |
| 63* | 11.327 | C10H14O2 | [M+H]+ | 3.35 | 153.0544, 151.0385, 123.0447 | Isotsaokoin | | CBXWAUXGOHHAIT-OPRDCNLKSA-N |  |
| 64 | 11.38 | C37H38O11 | [M+K]+ | -0.35 | 271.1334, 123.0447 | UNKNOWN | | UNKNOWN |  |
| 65* | 11.414 | C27H32O9 | [M+Na]+ | -0.69 | 271.0627, 151.0410, 131.0748 | Tsaokoflavanol P | | NONE | [2] |
| 66 | 11.448 | C25H30O7 | [M+Na]+ | -5.49 | 151.0385, 123.0447, 105.0695 | Amomutsaokin F* | | NONE | [4] |
| 67* | 11.569 | C21H26O5 | [M+K]+ | 3.58 | 151.0385, 105.0695 | 3-acetoxy-5- hydroxy-1,7-bis(4-hydroxyphenyl) heptane | | NONE | [3] |
| 68 | 11.603 | C23H28O7 | [M+H]+ | -3.65 | 177.0553, 123.0447, 107.0482 | Tsaokoflavanol A | | NONE | [2] |

**Supplementary Table 2. (*continued*)**

| **No.** | **tR(min)** | **Formula** | **Adduct** | **δ(ppm)** | **Fragment ions (m/z)** | **Name** | **InChIKeys** | **References** |
| --- | --- | --- | --- | --- | --- | --- | --- | --- |
| 69 | 11.758 | C22H28O6 | [M+Na]+ | -3.32 | 167.0744, 137.0591 | Quassin | IOSXSVZRTUWBHC-LBTVDEKVSA-N |  |
| 70* | 11.792 | C31H48O12 | [M+H]+ | 8.25 | 149.0234, 123.0447, 107.0504 | 3-[2-[6-[6-[[3,4-dihydroxy-4-(hydroxymethyl)oxolan-2-yl]oxymethyl]-3,4,5-trihydroxyoxan-2-yl]oxy-1,2,4a-trimethyl-5-methylidene-3,4,6,7,8,8a-hexahydro-2H-naphthalen-1-yl]ethyl]-2H-furan-5-one | UKQPKSUMKQCUJM-UHFFFAOYSA-N |  |
| 71* | 11.846 | C19H30O7 | [M+K]+ | -7.26 | 169.0905, 151.0385 | (6R,9S)-3-Oxo-alpha-ionol glucoside | SZOPSAFLRCYJCX-UHFFFAOYSA-N |  |
| 72 | 11.88 | C12H20O3 | [M+K]+ | 5.2 | 167.0744, 115.0554 | 1-acetate 2,8-decadiene-10-ol | NONE | [5] |
| 73* | 12.001 | C21H26O5 | [M+Na]+ | -2.95 | 187.1354, 167.0691, 115.0554 | 3,5-dihydroxy-1-(4-hydroxy-3-methoxyphenyl)-7-(3,4-dihy- droxyphenyl)heptane | NONE | [3] |
| 74 | 12.19 | C10H12O | [M+H]+ | 1.29 | 115.0554. 107.0504 | Cuminaldehyde | WTWBUQJHJGUZCY-UHFFFAOYSA-N |  |
| 75 | 12.379 | C19H24O7 | [M+K]+ | -0.93 | 151.0410, 137.0615, 107.0504 | UNKNOWN | UNKNOWN |  |
| 76* | 12.5 | C40H44O12 | [M+H]+ | 1.75 | 303.0879, 167.0717 | Taxuspinanane J | PPZXDJGRIUOJEB-ODILUHENSA-N |  |
| 77 | 12.622 | C18H22O6 | [M+Na]+ | -0.72 | 181.0885, 151.0410 | Chaetoaurin | IIUMSUVLRUBHEB-UHFFFAOYSA-N |  |
| 78* | 12.689 | C34H28O9 | [M+H]+ | 7.94 | 251.0968, 181.0885 | 2-[3-(3,5-dihydroxyphenyl)-6-hydroxy-2-(4-hydroxyphenyl)-2,3-dihydro-1-benzofuran-5-yl]-5,7-dihydroxy-8-(3-methylbuta-1,3-dienyl)-2,3-dihydrochromen-4-one | LYWIWUZRGVRZLM-UHFFFAOYSA-N |  |

**Supplementary Table 2. (*continued*)**

| **No.** | **tR(min)** | **Formula** | **Adduct** | **δ(ppm)** | **Fragment ions (m/z)** | **Name** | **InChIKeys** | **References** |
| --- | --- | --- | --- | --- | --- | --- | --- | --- |
| 79 | 12.723 | C12H20O4 | [M+K]+ | 2.71 | 229.0523, 217.1069, 147.0418 | UNKNOWN | UNKNOWN |  |
| 80 | 12.932 | C20H20O4 | [M+H]+ | -3.59 | 273.1486, 137.0615, 107.0504 | Tsaokone | NONE | [6] |
| 81* | 12.966 | C16H22O5 | [M+K]+ | -2.78 | 167.0744, 107.0504 | Leptol A | NONE |  |
| 82 | 13.033 | C10H16O2 | [M+H]+ | -0.56 | 137.0615, 107.0504 | 8-hydroxy-2,6-dimethyl-1,6-octadien-3-one | NONE | [5] |
| 83 | 13.121 | C21H22O5 | [M+K]+ | -9.65 | 177.0553, 151.0385, 107.0482 | 1,7-bis(4-hydroxy-3-methoxyphenyl)-4,6-hepta-dien-3one | NONE | [3, 7] |
| 84* | 13.31 | C18H28O4 | [M+Na]+ | -7.2 | 209.1198, 147.0442, 107.0504 | Dihydrocapsiate | RBCYRZPENADQGZ-UHFFFAOYSA-N |  |
| 85 | 13.465 | C20H26O7 | [M+K]+ | 3.73 | 137.0591, 105.0674, 103.0574 | Carinol | INPPVVSEQRZCLJ-UHFFFAOYSA-N |  |
| 86* | 13.741 | C40H46O8 | [M+H]+ | -1.15 | 401.1584, 177.0553, 107.0482 | 7-[3,4-Dihydroxy-5-[(3-hydroxyphenyl)methoxy]phenyl]-5-hydroxy-1-(4-hydroxy-3-methoxyphenyl)-8-(1-phenylcyclohexyl)octan-3-one | DCJBSLMLMSIFQQ-UHFFFAOYSA-N |  |
| 87 | 13.775 | C19H24O6 | [M+K]+ | 1.86 | 305.2648, 143.0741, 105.0716 | Pestalotiopsone D | FTZUVBRHOILKBH-UHFFFAOYSA-N |  |
| 88 | 14.119 | C20H30O3 | [M+K]+ | -8.32 | 177.0553, 165.0703, 107.0482 | [4-Hydroxy-5-methyl-2-(6-methylhept-5-en-2-yl)phenyl] 3-methylbutanoate | PWAPKQMZRQMUMX-UHFFFAOYSA-N |  |
| 89 | 14.173 | C25H24O10 | [M+K]+ | -1.02 | 423.1776, 319.0998, 133.0642 | 3,5,7-Trihydroxy-2-[3-(4-hydroxy-3-methoxyphenyl)-2-(hydroxymethyl)-2,3,4a,8a-tetrahydro-1,4-benzodioxin-6-yl]-2,3-dihydrochromen-4-one | VLGROHBNWZUINI-UHFFFAOYSA-N |  |

**Supplementary Table 2. (*continued*)**

| **No.** | | **tR(min)** | **Formula** | **Adduct** | **δ(ppm)** | **Fragment ions (m/z)** | **Name** | **InChIKeys** | **References** |
| --- | --- | --- | --- | --- | --- | --- | --- | --- | --- |
| 90* | 14.207 | C33H45NO5 | [M+H]+ | 6.26 | 284.2361, 184.0745, 144.0818 | 1-(3-hydroxy-10,13-dimethyl-2,3,4,5,6,7,8,9,11,12,14,15-dodecahydro-1H-cyclopenta[a]phenanthren-17-yl)-2-(4-methoxy-6-methyl-7,8-dihydro-5H-[1,3]dioxolo[4,5-g]isoquinolin-5-yl)ethanone | OZJCHCMGKZJUAK-UHFFFAOYSA-N |  |
| 91 | 14.241 | C20H34O | [M+H]+ | 0.15 | 137.0591, 119.0846 | Manool | CECREIRZLPLYDM-QGZVKYPTSA-N |  |
| 92 | 14.275 | C27H46O10 | [M+K]+ | 3.31 | 423.1818, 131.0842 | [4-hydroxy-5-methyl-2-(6-methylhept-5-en-2-yl)phenyl] 3-methylbutanoate | PWAPKQMZRQMUMX-UHFFFAOYSA-N |  |
| 93* | 14.396 | C24H30O7 | [M+K]+ | 0.03 | 271.1368, 171.0652, 137.0591 | Mammea E/BB | CIJFRPODNXMJFU-UHFFFAOYSA-N |  |
| 94 | 14.483 | C32H52O7 | [M+K]+ | 10.51 | 339.1542, 255.1073 | [11-Hydroxy-4,4,10,13,14-pentamethyl-7-oxo-17-(5,6,7-trihydroxy-6-methylheptan-2-yl)-1,2,3,5,6,11,12,15,16,17-decahydrocyclopenta[a]phenanthren-3-yl] acetate | ATCQZFPOJSWSCB-UHFFFAOYSA-N |  |
| 95 | 14.551 | C19H22O6 | [M+H]+ | 2.35 | 183.1042, 115.0554 | 5'-Hydroxy-3',4',7,8-tetramethoxyflavan | YZRKAZJVZYMSAE-UHFFFAOYSA-N |  |
| 96 | 14.639 | C21H28O7 | [M+Na]+ | 4.24 | 271.1368, 255.1073, 105.0695 | Altissimacoumarin C | NIDLLNZZMATZKI-IIBYNOLFSA-N |  |
| 97* | 14.706 | C25H32O6 | [M+Na]+ | -2.78 | 391.2047, 137.0615 | Kampanol A | BOVRDZLKBBUXQQ-BOWIAGTOSA-N |  |
| 98* | 14.74 | C12H18O | [M+H]+ | 8.65 | 137.0615, 107.0482 | (8R,8aS)-8,8a-Dimethyl-3,4,6,7,8,8a-hexahydronaphthalen-2(1H)-one | RKKGFWOMSDLRQL-UHFFFAOYSA-N |  |
| 99* | 14.861 | C35H52O14 | [M+Na]+ | -6.42 | 601.3508, 117.0569 | Olitoriside | KQBVSIZPUWODNU-UHFFFAOYSA-N |  |

**Supplementary Table 2. (*continued*)**

| **No.** | | **tR(min)** | **Formula** | **Adduct** | **δ(ppm)** | **Fragment ions (m/z)** | **Name** | **InChIKeys** | **References** |
| --- | --- | --- | --- | --- | --- | --- | --- | --- | --- |
| 100 | 14.983 | C31H50O3 | [M-H2O+H]+ | 8.52 | 385.1617, 115.0554, 107.0504 | methyl (4aS,6aS,6bR,8aR,10S,12aR,12bR,14bS)-10-hydroxy-2,2,6a,6b,9,9,12a-heptamethyl-1,2,3,4,4a,5,6,6a,6b,7,8,8a,9,10,11,12,12a,12b,13,14b-icosahydropicene-4a-carboxylate | BTXWOKJOAGWCSN-UHFFFAOYSA-N |  |
| 101 | 15.017 | C22H22N2O4 | [M+Na]+ | -7.99 | 325.1778, 204.0759, 152.0612 | 7-(2-(4-methylpiperazin-1-yl)-2-oxoethoxy)-3-phenyl-4H-chromen-4-one | DTQQUBXFEOUMHS-UHFFFAOYSA-N |  |
| 102 | 15.104 | C23H22O4 | [M+K]+ | 4.6 | 183.1042, 115.0532 | 2-methyl-4-oxo-3-phenyl-4H-chromen-7-yl cyclohexanecarboxylate | SZPWOYWUWUOECQ-UHFFFAOYSA-N |  |
| 103 | 15.138 | C20H24O4 | [M+Na]+ | -6.46 | 209.1198, 165.0703 | 4-[3-Hydroxy-7-(4-hydroxyphenyl)hept-6-enyl]-2-methoxyphenol | RDXGNAHMAOEPKS-UHFFFAOYSA-N |  |
| 104* | 15.448 | C27H36O7 | [M+H]+ | -8.94 | 177.0526, 165.0703 | [1,7-Bis(4-hydroxy-3-methoxyphenyl)-9-methyl-5-oxodecan-3-yl] acetate | JLKCKUALZIAXCR-UHFFFAOYSA-N |  |
| 105 | 16.069 | C14H22O4 | [M+K]+ | -0.13 | 147.0442, 107.0715 | 1,10-diacetate-2,8-decadiene-1,10-diol | NONE | [5] |
| 106 | 16.447 | C31H30O10 | [M+K]+ | -5.42 | 537.3056, 177.1506, 107.0715 | Artonin R | DHSZUELPJXKISQ-PKNBQFBNSA-N |  |
| 107 | 16.689 | C34H42O9 | [M+Na]+ | 2.19 | 181.0885, 103.0553 | 1-[1-(3,4-Dihydroxy-5-methoxyphenyl)cyclohexyl]-4-hydroxy-3-[[3-hydroxy-2-(hydroxymethyl)phenyl]methyl]-6-(4-hydroxy-3-methoxyphenyl)hexan-2-one | VMCWYJRDPPALJB-UHFFFAOYSA-N |  |
| 108 | 16.811 | C32H44O16 | [M+K]+ | 0.72 | 353.0556, 209.0843, 105.0695 | methyl 2-(furan-3-yl)-9-hydroxy-6a,10b-dimethyl-4-oxo-6-[3,4,5-trihydroxy-6-[(3,4,5-trihydroxyoxan-2-yl)oxymethyl]oxan-2-yl]oxy-1,2,4a,5,6,9,10,10a-octahydrobenzo[f]isochromene-7-carboxylate | YZFIWGRLAXHHNA-UHFFFAOYSA-N |  |

**Supplementary Table 2. (*continued*)**

| **No.** | | **tR(min)** | **Formula** | **Adduct** | **δ(ppm)** | **Fragment ions (m/z)** | **Name** | **InChIKeys** | **References** |
| --- | --- | --- | --- | --- | --- | --- | --- | --- | --- |
| 109 | 17 | C20H28O3 | [M+H]+ | -5.63 | 183.1042, 161.0622, 119.0712 | Cryptanol | KKCFPHJPFNFLPA-RBZFPXEDSA-N |  |
| 110* | 17.033 | C20H34O4 | [M+K]+ | -8.67 | 329.2121, 183.1042 | 1-[9-hydroxy-8-(hydroxymethyl)-2,4b,8-trimethyl-4,4a,5,6,7,8a,9,10-octahydro-3H-phenanthren-2-yl]ethane-1,2-diol | NEUCUEHDGUFUDL-UHFFFAOYSA-N* |  |
| 111 | 17.067 | C14H24O4 | [M+Na]+ | -0.86 | 141.0694, 115.0532 | UNKNOWN | UNKNOWN |  |
| 112 | 17.121 | C31H43NO4 | [M+H]+ | 5.44 | 184.0718 | Sarcotragin A | NONE |  |
| 113 | 17.222 | C27H46O14 | [M+H]+ | 2.24 | 453.1727, 335.2615, 107.0736 | Dictamnoside G | NONE |  |
| 114* | 17.276 | C24H26O6 | [M+H]+ | 2.72 | 271.0997, 121.0870 | Prebarbigerone | RJNWIKZTUCDSTR-UHFFFAOYSA-N |  |
| 115 | 17.31 | C22H32O4 | [M+Na]+ | -3.39 | 197.1065, 105.0695 | Moniliferanone D | OLPSQQCRGWVMPG-NQLNTKRDSA-N |  |
| 116 | 17.499 | C18H30O3 | [M-H2O+H]+ | 4.1 | 105.0695, 115.0554 | 9-hydroxy-6,10,12-octadecatrienoic acid | NONE | [5] |
| 117 | 17.654 | C34H50O5 | [M+K]+ | -1.52 | 315.1644, 115.0532 | [3-(7-acetyloxy-6,10-dimethylundeca-3,5,9-trien-2-ylidene)-3a,6,6,9a-tetramethyl-2-oxo-1,4,5,5a,7,8,9,9b-octahydrocyclopenta[a]naphthalen-7-yl] acetate | LYMVREJBODRMMO-UHFFFAOYSA-N |  |
| 118* | 17.688 | C14H24O4 | [M+Na]+ | -0.86 | 177.0553, 117.0569 | 5-[2-(Hydroxymethyl)-3-oxooctyl]-4-methyloxolan-2-one | SDLFSCGVKKSEPZ-UHFFFAOYSA-N |  |
| 119 | 17.897 | C23H41NO2 | [M+H]+ | -9.89 | 288.2692, 146.0955 | Terminaline | QTNGLMWAVBOBLJ-RCFZRFIHSA-N |  |
| 120* | 18.086 | C27H46O9 | [M+Na]+ | -4.27 | 473.2843, 321.0510, 105.0695 | methyl 9-[4-[2-(1,3-dihydroxy-2-methylbutyl)-7-hydroxy-3,3a,4,6,7,7a-hexahydro-2H-furo[3,2-c]pyran-6-yl]-3-methylbut-2-enoyl]oxynonanoate | BGUPLOONNWDPDJ-UHFFFAOYSA-N |  |

**Supplementary Table 2. (*continued*)**

| **No.** | | **tR(min)** | **Formula** | **Adduct** | **δ(ppm)** | **Fragment ions (m/z)** | **Name** | **InChIKeys** | **References** |
| --- | --- | --- | --- | --- | --- | --- | --- | --- | --- |
| 121* | 18.207 | C34H44O9 | [M+K]+ | 4.51 | 127.0557, 103.0553 | Neobonaspectin B | NONE |  |
| 122 | 18.464 | C33H42O10 | [M+H]+ | 7.98 | 537.3009, 317.1801 | (2,8,14-triacetyloxy-7-hydroxy-1,5,9,12,12-pentamethyl-13-oxo-4-tetracyclo[7.6.0.03,7.010,14]pentadecanyl) benzoate | IEQTVHJLWRGNIY-UHFFFAOYSA-N |  |
| 123 | 18.74 | C34H50O5 | [M+Na]+ | -0.1 | 301.2028, 147.0988 | [3-(7-acetyloxy-6,10-dimethylundeca-3,5,9-trien-2-ylidene)-3a,6,6,9a-tetramethyl-2-oxo-1,4,5,5a,7,8,9,9b-octahydrocyclopenta[a]naphthalen-7-yl] acetate | LYMVREJBODRMMO-UHFFFAOYSA-N |  |
| 124 | 18.983 | C30H40O5 | [M+Na]+ | 1.45 | 361.3273, 191.1680, 115.0554 | Rhabdastrellin A | ZZGSZXWZQYCHPP-YFMITETISA-N |  |
| 125 | 19.084 | C31H58O14 | [M+K]+ | -1.81 | 515.3190, 105.0695 | [2-Hydroxy-3-[3,4,5-trihydroxy-6-[[3,4,5-trihydroxy-6-(hydroxymethyl)oxan-2-yl]oxymethyl]oxan-2-yl]oxypropyl] hexadecanoate | OQWOKDQAPBSVGH-UHFFFAOYSA-N |  |
| 126 | 19.395 | C40H51NO5 | [M+H]+ | 0.48 | 232.2064, 146.0955 | 7-[4,5-Dihydroxy-6-(hydroxymethyl)-3-(2,3,4-trihydroxy-5-methylcyclohexyl)oxyoxan-2-yl]oxy-5-hydroxy-2-(3-hydroxy-4-methoxyphenyl)chromen-4-one | OSYVKPQFZOBZMB-UHFFFAOYSA-N |  |
| 127 | 20.015 | C24H32O5 | [M+K]+ | 3.83 | 319.1948, 131.0842, 107.0504 | Nevskin | WNANPKYNOALKIV-UHFFFAOYSA-N |  |
| 128 | 20.224 | C18H26O2 | [M+Na]+ | 1.1 | 131.0842, 105.0695 | Citronellyl phenylacetate | CVJBFMVLVJZZMM-UHFFFAOYSA-N |  |
| 129 | 20.534 | C22H36O4 | [M+Na]+ | 5.44 | 223.0656, 117.0569, 105.0695 | Hamachilobene E | NONE |  |
| 130 | 20.636 | C32H44O4 | [M+H]+ | -2.57 | 147.1013, 115.0554 | UNKNOWN | UNKNOWN |  |
| 131* | 20.723 | C28H47NO2 | [M+H]+ | 0.36 | 344.3326, 216.1733, 146.0955 | Hapepunine | QFHXSIDXKCKLAC-UHFFFAOYSA-N |  |

**Supplementary Table 2. (*continued*)**

| **No.** | | **tR(min)** | **Formula** | **Adduct** | **δ(ppm)** | **Fragment ions (m/z)** | **Name** | **InChIKeys** | **References** |
| --- | --- | --- | --- | --- | --- | --- | --- | --- | --- |
| 132 | 21 | C22H32O4 | [M+K]+ | -1.34 | 131.0842, 105.0716 | (2-ethenyl-4a-hydroxy-2,4b,8,8-tetramethyl-5-oxo-4,6,7,8a,9,10-hexahydro-3H-phenanthren-9-yl) acetate | ACBLGYUNJSYJPY-UHFFFAOYSA-N |  |
| 133* | 21.155 | C28H47NO2 | [M+H]+ | 0.36 | 344.3326, 216.1733, 146.0955 | Hapepunine isomers | NONE |  |
| 134* | 21.499 | C22H32O4 | [M+K]+ | -1.34 | 131.0748, 105.0716 | 2-[2-[2-Hydroxy-2-(hydroxymethyl)-6,6-dimethylcyclohexyl]ethyl]-2,7-dimethylchromen-5-ol | VQUOAESRDYPVEX-UHFFFAOYSA-N |  |
| 135* | 21.533 | C22H39NO | [M+H]+ | -0.18 | 167.1273, 115.0554 | 10,13-dimethyl-17-[1-(methylamino)ethyl]-2,3,4,5,6,7,8,9,11,12,14,15,16,17-tetradecahydro-1H-cyclopenta[a]phenanthren-3-ol | ZBGNYXYMSKSPSB-UHFFFAOYSA-N |  |
| 136 | 21.654 | C27H50O9 | [M+Na]+ | -0.96 | 191.1652, 143.0839 | UNKNOWN | UNKNOWN |  |
| 137 | 22.153 | C22H38O5 | [M+K]+ | -0.05 | 157.1008, 115.0554 | 2-[2'-(Hydroxymethyl)-3,6a,8,10b-tetramethylspiro[1,4a,5,6,8,9,10,10a-octahydronaphtho[2,1-d][1,3]dioxine-7,5'-oxolane]-2'-yl]ethanol | QZOBEYQBKBPACE-UHFFFAOYSA-N |  |
| 138 | 22.551 | C20H32O3 | [M+K]+ | -2.18 | 131.0842, 133.0972 | Toonaciliatin M | PJBQQIKTIGUTST-PDURBABISA-N |  |
| 139 | 22.619 | C20H30O2 | [M+K]+ | -2.19 | 129.0702, 115.0532 | UNKNOWN | UNKNOWN |  |
| 140* | 22.74 | C29H40O6 | [M+H]+ | 0.55 | 133.0996, 131.0842, 109.1031, 103.0532 | (5S,7R,10S,14R,15R,16S,19S,20R,22S)-7-hydroxy-19-[(3S)-3-hydroxy-2-methyl-4-oxopentan-3-yl]-10,14-dimethyl-18,21-dioxahexacyclo[12.9.0.02,11.05,10.015,22.016,20]tricosa-1(23),2(11)-dien-17-one | JHLZEFPEROQOHV-DCGZGIOFSA-N |  |
| 141 | 22.774 | C30H48O | [M+H]+ | 0.22 | 147.0815, 115.0532 | Cornusalterin F | SRZGQWOHBSWCAT-RIZYFFEQSA-N |  |

**Supplementary Table 2. (*continued*)**

| **No.** | | | **tR(min)** | | **Formula** | | **Adduct** | | **δ(ppm)** | | **Fragment ions (m/z)** | | **Name** | | **InChIKeys** | | **References** | |
| --- | --- | --- | --- | --- | --- | --- | --- | --- | --- | --- | --- | --- | --- | --- | --- | --- | --- | --- |
| 142* | 22.895 | | C20H32O | | [M+H]+ | | -2.11 | | 265.1493, 205.1794 | | Amotsaokonal B | | NONE | | [8] | |
| 143 | 23.118 | | C21H38O4 | | [M-H2O+H]+ | | 2.88 | | 157.1008, 131.0865 | | UNKNOWN | | UNKNOWN | |  | |
| 144* | 23.239 | | C22H32O3 | | [M+K]+ | | -6.09 | | 165.0730, 131.0842 | | (10,13-dimethyl-3-oxo-1,2,6,7,8,9,11,12,14,15,16,17-dodecahydrocyclopenta[a]phenanthren-17-yl) propanoate | | PDMMFKSKQVNJMI-UHFFFAOYSA-N | |  | |
| 145* | 23.516 | | C29H36O4 | | [M+K]+ | | -1.3 | | 131.0865, 119.0846 | | Pawhuskin A | | LZRXMBPDNILKDO-ZVBRSKEYSA-N | |  | |
| 146 | 23.826 | | C22H37NO | | [M+H]+ | | 4.5 | | 115.0554, 107.0715 | | Holaphyllinol | | NONE | |  | |
| 147 | 24.602 | | C18H30O | | [M+H]+ | | 0.16 | | 207.0713, 107.0736 | | Farnesylacetone | | LTUMRKDLVGQMJU-IUBLYSDUSA-N | |  | |
| 148 | 24.636 | | C19H38O4 | | [M+K]+ | | 4.75 | | 161.0284, 141.0718 | | Methyl 9,10-dihydroxyoctadecanoate | | RITHLQKJQSKUAO-UHFFFAOYSA-N | |  | |
| 149* | 24.723 | | C24H42O5 | | [M+K]+ | | 2.88 | | 325.2073, 115.0532, 105.0695 | | 17-(6,6-Dihydroxyhexan-2-yl)-10-methyl-1,2,3,4,5,6,7,8,9,11,12,13,14,15,16,17-hexadecahydrocyclopenta[a]phenanthrene-3,7,12-triol | | USCOGWNSMMJTRS-UHFFFAOYSA-N | |  | |
| 150* | 25.101 | | C18H28O | | [M+H]+ | | -3.87 | | 131.0865, 115.0532, 105.0716 | | 15,16-Dinor-8(17),11-labdadien-13-one | | GWLGWWOKIBLQJF-YGUYEABBSA-N | |  | |
| 151* | 25.344 | | C20H34O | | [M-H2O+H]+ | | 3.02 | | 129.0679, 115.0554, 109.1009 | | Geranylgeraniol | | OJISWRZIEWCUBN-QIRCYJPOSA-N | |  | |
| 152 | 25.445 | | C20H30O | | [M+H]+ | | -4.74 | | 117.0547, 105.0695, 103.0553 | | Amotsaokonal A | | NONE | | [8] | |

**Supplementary Fig.1**


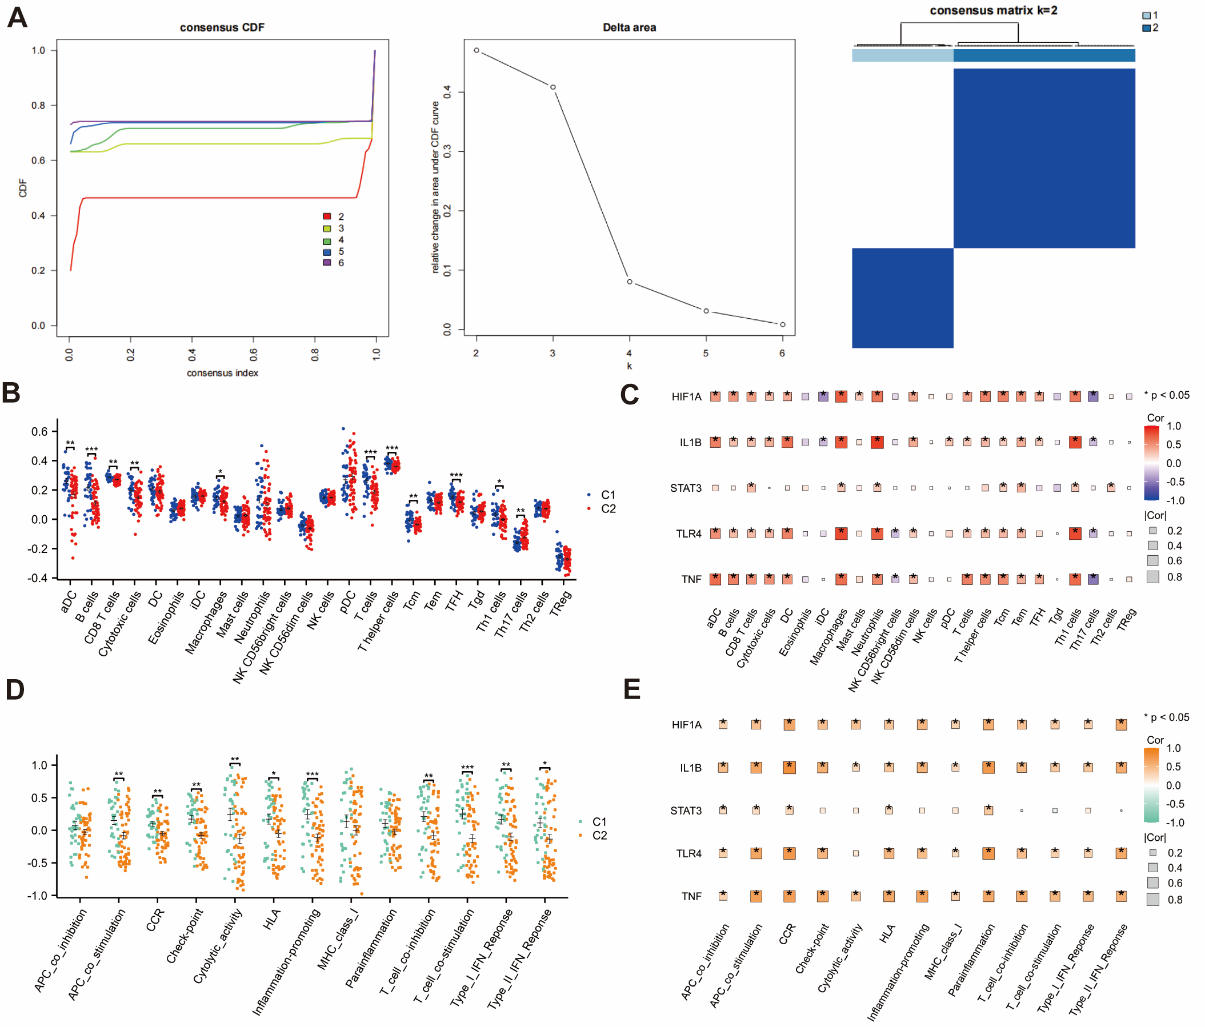


**Supplementary Fig.1.** Immune infiltration analysis. (A) Consensus clustering heatmap; (B) Box plot of immune cell expression in UC subtypes; (C) Heatmap of hub gene expression across immune cells; (D) Box plot of immune pathway expression in UC subtypes; (E) Heatmap of hub gene expression across immune pathways.

**References:**

1. He XF, Zhang XK, Geng CA, Hu J, Zhang XM, Guo YQ, et al. Tsaokopyranols A-M, 2,6-epoxydiarylheptanoids from Amomum tsao-ko and their α-glucosidase inhibitory activity. Bioorg Chem. 2020;96:103638.

2. He XF, Chen JJ, Li TZ, Zhang XK, Guo YQ, Zhang XM, et al. Nineteen New Flavanol-Fatty Alcohol Hybrids with α-Glucosidase and PTP1B Dual Inhibition: One Unusual Type of Antidiabetic Constituent from Amomum tsao-ko. J Agric Food Chem. 2020;68(41):11434-48.

3. He XF, Wang HM, Geng CA, Hu J, Zhang XM, Guo YQ, et al. Amomutsaokols A-K, diarylheptanoids from Amomum tsao-ko and their α-glucosidase inhibitory activity. Phytochemistry. 2020;177:112418.

4. He X-F, Ji-JunHuang, Xiao-YanHu, JingZhang, Xu-KeGuo, Yuan-QiangZhang, Xue-MeiGeng, Chang-An. The antidiabetic potency of Amomum tsao-ko and its active flavanols, as PTP1B selective and alpha-glucosidase dual inhibitors. Industrial Crops and Products. 2021;160(1).

5. Lee S, Lee JC, Subedi L, Cho KH, Kim SY, Park HJ, et al. Bioactive compounds from the seeds of Amomum tsaoko Crevost et Lemaire, a Chinese spice as inhibitors of sphingosine kinases, SPHK1/2. RSC Adv. 2019;9(58):33957-68.

6. Shang M, Wang J, Dai G, Zheng J, Song J, Duan B. A review on chemical constituents, pharmacological effects, and clinical applications of Tsaoko Fructus and predictive analysis of its Q-Markers. Chinese Traditional and Herbal Drugs. 2022;53(10):3251-68.

7. Lee KY, Kim SH, Sung SH, Kim YC. Inhibitory constituents of lipopolysaccharide-induced nitric oxide production in BV2 microglia isolated from Amomum tsao-ko. Planta Med. 2008;74(8):867-9.

8. Hong SS, Lee JH, Choi YH, Jeong W, Ahn EK, Lym SH, et al. Amotsaokonal A–C, benzaldehyde and cycloterpenal from Amomum tsao-ko. Tetrahedron Letters. 2015;56(48):6681-4.
